# Supplementary material for: The Effects of a Cognitively Challenging Physical Activity Intervention on School Children’s Executive Functions and Motivational Regulations
Source: MDPI journal article supplement (doi:10.3390/ijerph191912742), 2022-10-05
Supplement: s1 [file s1]

## Supplementary material 1.

### Cognitively enriched physical activity intervention (Group 1)

[For a similar approach with younger children, see Biino et al., 2021]

|                                                                                                                                                                                                        |                                                                                                                                                                                                                                                                                                                                                                                                                                                                                                                                                                                                                                                                                                                                                                                                                                                                                                                                                                                                                                                                                                                                                                                                                             |
|--------------------------------------------------------------------------------------------------------------------------------------------------------------------------------------------------------|-----------------------------------------------------------------------------------------------------------------------------------------------------------------------------------------------------------------------------------------------------------------------------------------------------------------------------------------------------------------------------------------------------------------------------------------------------------------------------------------------------------------------------------------------------------------------------------------------------------------------------------------------------------------------------------------------------------------------------------------------------------------------------------------------------------------------------------------------------------------------------------------------------------------------------------------------------------------------------------------------------------------------------------------------------------------------------------------------------------------------------------------------------------------------------------------------------------------------------|
| <b>Content</b>                                                                                                                                                                                         | The content of the cognitively enriched physical activity intervention consisted of cognitively challenging physical activity games based on different principles derived from motor learning and cognitive stimulation theories and practices.                                                                                                                                                                                                                                                                                                                                                                                                                                                                                                                                                                                                                                                                                                                                                                                                                                                                                                                                                                             |
| <b>Teaching strategies</b>                                                                                                                                                                             | Central to the games was to generate and maintain mental effort at an optimal challenge point by progressively increasing the complexity of movement coordination and/or the demands on thoughtful action. To this aim, games can be varied by: <ul style="list-style-type: none"><li>• Alternating the roles played children (e.g., roles of tagger and tagged children in tag games);</li><li>• Changing the motor demands by adding movements to a sequence, or increasing the coordinative difficulty of the single movements that compose a sequence;</li><li>• Altering the structure of a game to encourage problem solving and divergent discovery.</li></ul>                                                                                                                                                                                                                                                                                                                                                                                                                                                                                                                                                       |
| <b>Principles</b><br><br>(described in detail in: Tomporowski, P. D., B. A. McCullick, and C. Pesce. 2015. Enhancing Children's Cognition with Physical Activity Games. Champaign, IL: Human Kinetics. | <p>The <b>principle of contextual interference</b> set that the context and the game conditions change requiring children to make unpredictable sequences of actions and perform shifts across multiple skills, or variations of a skill. This way children may generate mental effort and challenge cognitive flexibility to select every time different motor programs and movement parameters.</p> <p>The <b>principle of mental control</b> is operationalized in:</p> <ul style="list-style-type: none"><li>• stopping games or tasks, where children must on occasion refrain from or stop moving;</li><li>• updating games or tasks, where children must continuously update information held in memory to cope with ongoing movement tasks properly;</li><li>• switching games or tasks, in which perception-action couplings and criteria to perform movement tasks are frequently and suddenly changed).</li></ul> <p>The <b>principle of promoting discovery</b> is translated into practice by involving children in conditions requiring divergent discovery (generating multiple solutions to a problem) and in open-ended games (the rules and the goal are explained, but not how to perform the game).</p> |
| <b>Sample games</b>                                                                                                                                                                                    | A description of sample games is presented in Appendix 1. A detailed and in-depth analysis of two sample games (Pesce et al., 2016) is presented in Supplementary File 2.<br>Pesce, C., Marchetti, R., Motta, A., & Bellucci, M. (eds.) (2016). Joy of moving - MindMovers & ImaginAction. Playing with variability to                                                                                                                                                                                                                                                                                                                                                                                                                                                                                                                                                                                                                                                                                                                                                                                                                                                                                                      |

|  |                                                                                         |
|--|-----------------------------------------------------------------------------------------|
|  | promote motor, cognitive and citizenship development. Torgiano (PG): Calzetti-Mariucci. |
|--|-----------------------------------------------------------------------------------------|

Biino, V., Tinagli, V., Borioni, F., & Pesce, C. (2021). Cognitively enriched physical activity may foster motor competence and executive function as early as preschool age: A pilot trial. *Physical Education and Sport Pedagogy* [online first]. <https://doi.org/10.1080/17408989.2021>.
